# Supplementary material for: Base-catalyzed retro-Claisen condensation: a convenient esterification of alcohols via C–C bond cleavage of ketones to afford acylating sources
Source: Royal Society of Chemistry journal article supplement (doi:10.1039/c4ra04618h), 2014-01-01

## Base-catalyzed Retro-Claisen Condensation: A Convenient Esterification of Alcohols via C-C Bond Cleavage of Ketones to Afford Acylating Sources

Feng Xie<sup>a</sup>, Fengxia Yan<sup>a</sup>, Mengmeng Chen<sup>a</sup>, Min Zhang<sup>a,b\*</sup>

<sup>a</sup> School of Chemical & Material Engineering, Jiangnan University, Wuxi 214122, People's Republic of China.

<sup>b</sup> School of Chemistry & Chemical Engineering, South China University of Technology, 381 Wushan Rd, Guangzhou 510641, People's Republic of China

### Supplementary Information

#### Table of contents

|                                                                           |      |
|---------------------------------------------------------------------------|------|
| General information                                                       | 2    |
| Typical procedure for synthesis of 3-pyridylmethyl acetate ( <b>3a</b> ). | 2    |
| NMR spectra of the obtained compounds                                     | 3-17 |

## General information

All the obtained products were characterized by melting points (m.p),  $^1\text{H}$ -NMR,  $^{13}\text{C}$ -NMR infrared spectra (IR), the NMR spectra of the known compounds were found to be identical with the ones reported in the literatures. Additionally, the solid and new products were further determined by Melting points and mass spectra (MS), respectively.  $^1\text{H}$ -NMR and  $^{13}\text{C}$ -NMR spectra were obtained on a Bruker Avance 400 MHz NMR spectrometer; Mass spectra were recorded on a Shimadzu GC-MS-QP5050A spectrometer at an ionization voltage of 70 eV equipped with a DB-WAX capillary column (internal diameter: 0.25 mm, length: 30 m). Melting points were measured on an Electrothermal SGW-X4 microscopy digital melting point apparatus and are uncorrected; IR spectra were recorded on a Bruker Vector 22 spectrometer; Chemical shifts were reported in parts per million (ppm,  $\delta$ ) downfield from tetramethylsilane. Proton coupling patterns are described as singlet (s), doublet (d), triplet (t), multiplet (m); TLC was performed using commercially prepared 100-400 mesh silica gel plates (GF254), and visualization was effected at 254 nm; All the reagents were purchased from commercial sources (J&KChemic, TCI, Fluka, Acros, SCRC), and used without further purification.

## Typical procedure for synthesis of 3-pyridylmethyl acetate (**3a**).

*t*-BuONa (0.028 g, 0.3 mmol), 3-(Hydroxymethyl)pyridine **1a** (0.131 g, 1.2 mmol), acetylacetone **2a** (0.1g, 1 mmol) and *t*-amyl alcohol (1 mL) were added successively to a Schlenk tube, it was then closed and the resulting mixture was heated at 120 °C for 18 h in an oil bath. After cooling down to room temperature, the reaction mixture was then filtered and concentrated under vacuum, the obtained crude product was directly purified by preparative TLC on silica, eluting with petroleum ether (60-90°C): ethyl acetate (3:1) to give 3-pyridylmethyl acetate **3a** as a yellow oil (0.110 g, 75%).

## NMR spectra of the obtained compounds

### <sup>1</sup>H-NMR spectrum of 3-Pyridylmethyl acetate (3a)

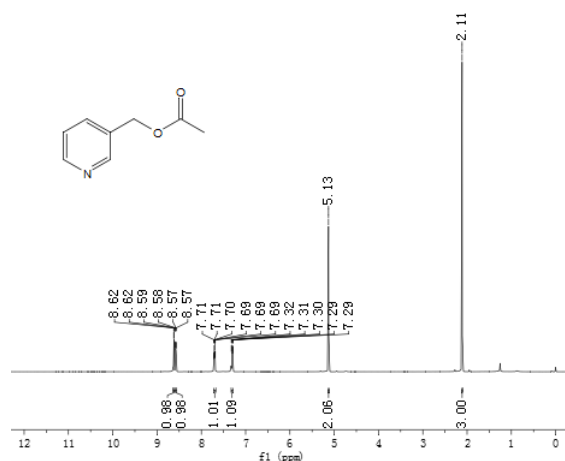

### <sup>13</sup>C-NMR spectrum of 3-Pyridylmethyl acetate (3a)

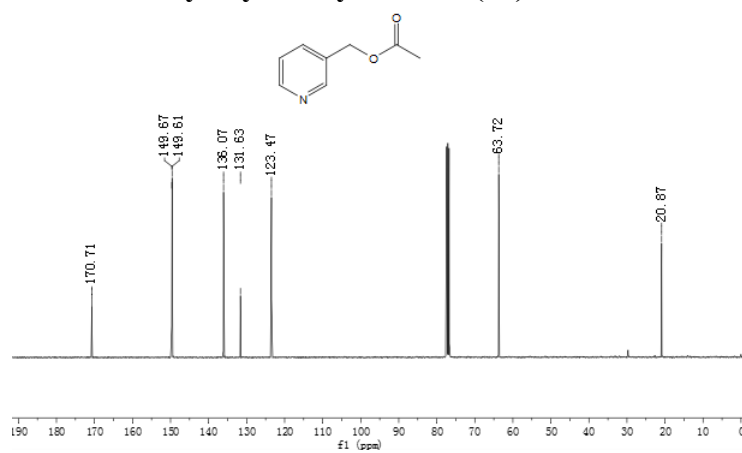

### <sup>1</sup>H-NMR spectrum of 4-Pyridylmethyl acetate (3b)

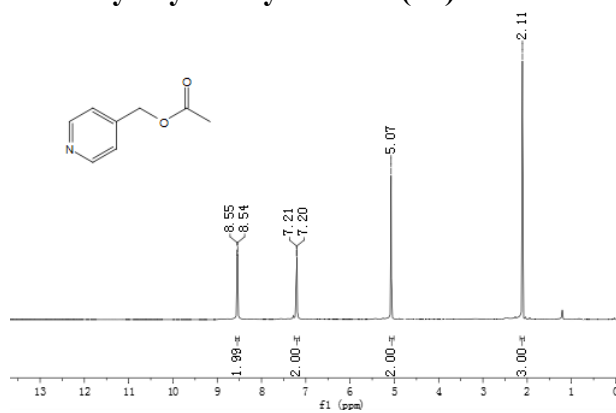

**$^{13}\text{C}$ -NMR spectrum of 4-Pyridylmethyl acetate (3b)**

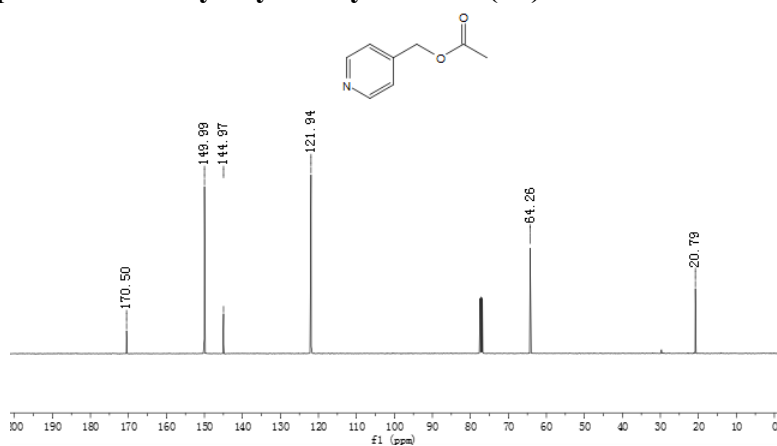

**$^1\text{H}$ -NMR spectrum of 2-Pyridylmethyl acetate (3c)**

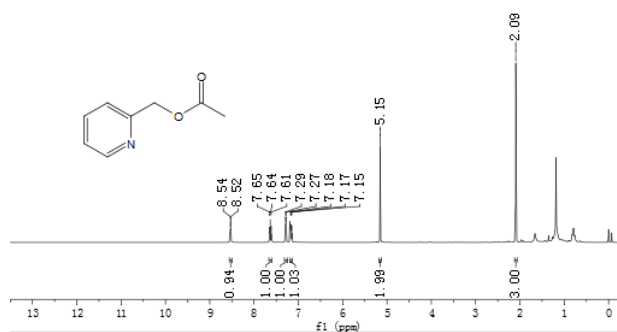

**$^{13}\text{C}$ -NMR spectrum of 2-Pyridylmethyl acetate (3c)**

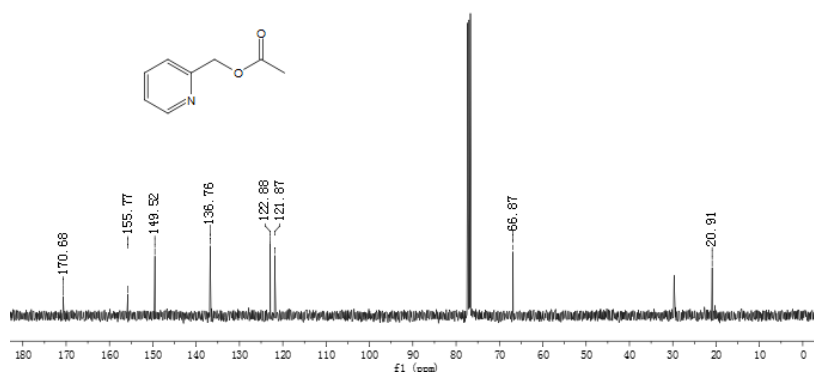

**<sup>1</sup>H-NMR spectrum of (4-chloropyridin-2-yl)methyl acetate (3d)**

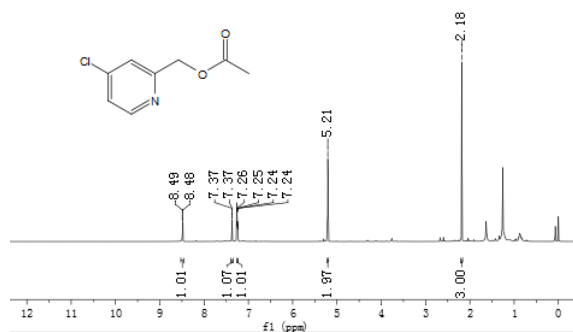

**<sup>13</sup>C-NMR spectrum of (4-chloropyridin-2-yl)methyl acetate (3d)**

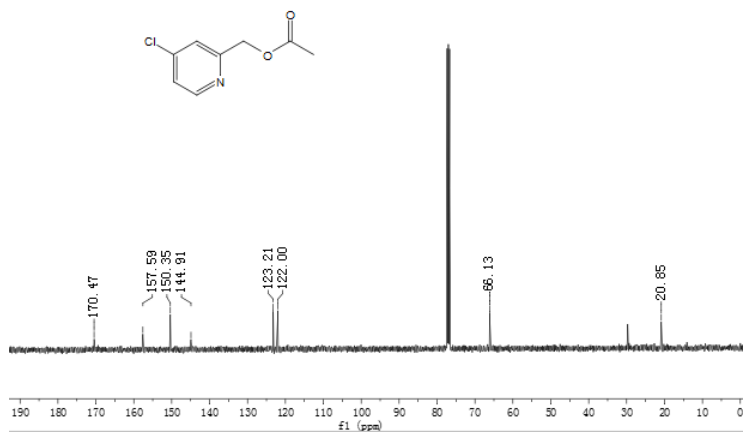

**<sup>1</sup>H-NMR spectrum of (2-chloropyridin-3-yl)methyl acetate (3e)**

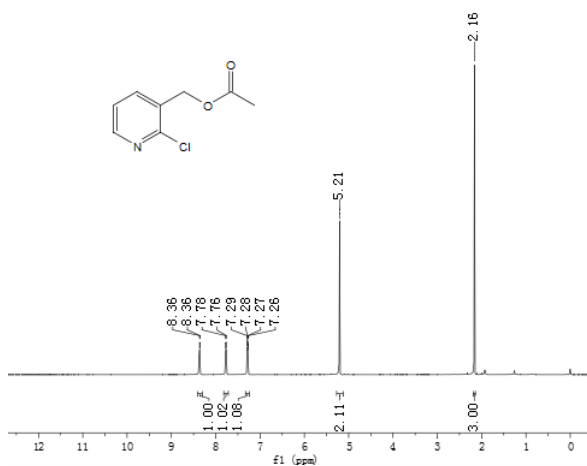

**<sup>13</sup>C-NMR spectrum of (2-chloropyridin-3-yl)methyl acetate**

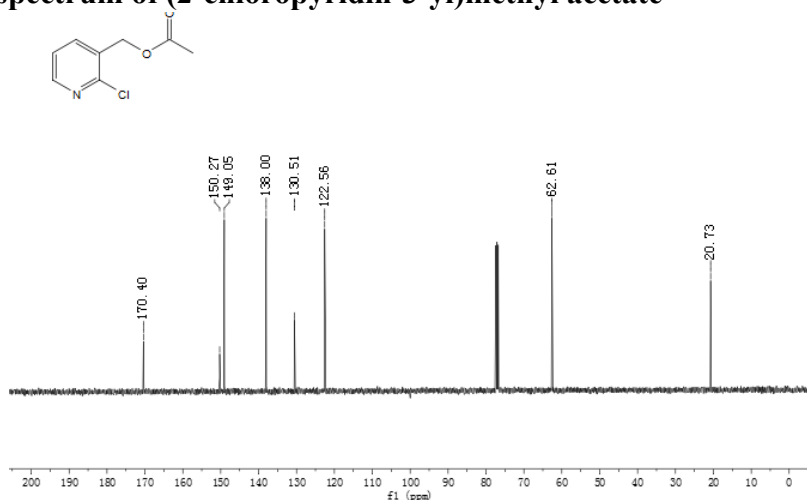

**<sup>1</sup>H- NMR spectrum of 3-Pyridylmethyl benzoate (3f)**

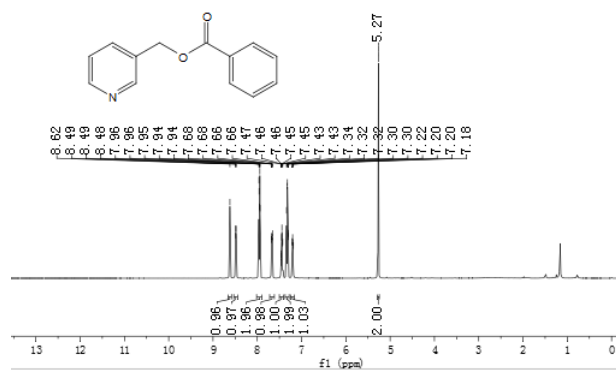

**<sup>13</sup>C-NMR spectrum of 3-Pyridylmethyl benzoate (3f)**

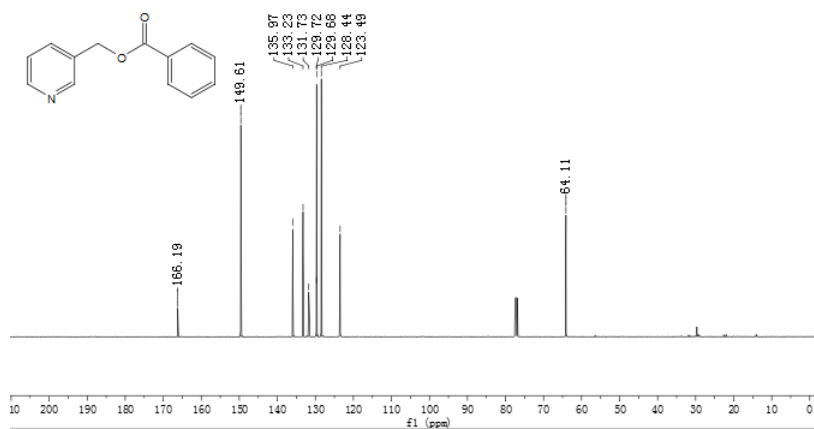

**<sup>1</sup>H-NMR spectrum of 4-Pyridylmethyl benzoate (3g)**

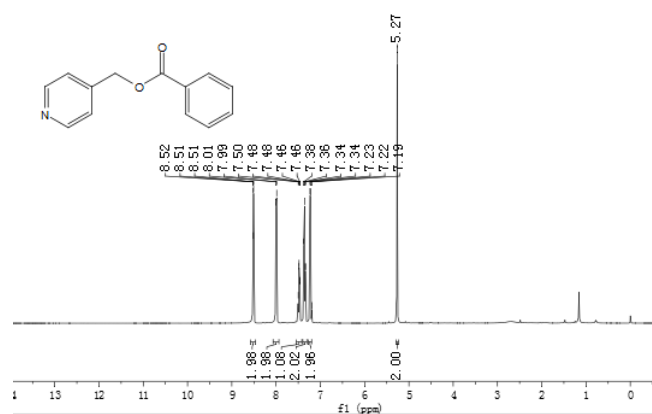

**<sup>13</sup>C-NMR spectrum of 4-Pyridylmethyl benzoate (3g)**

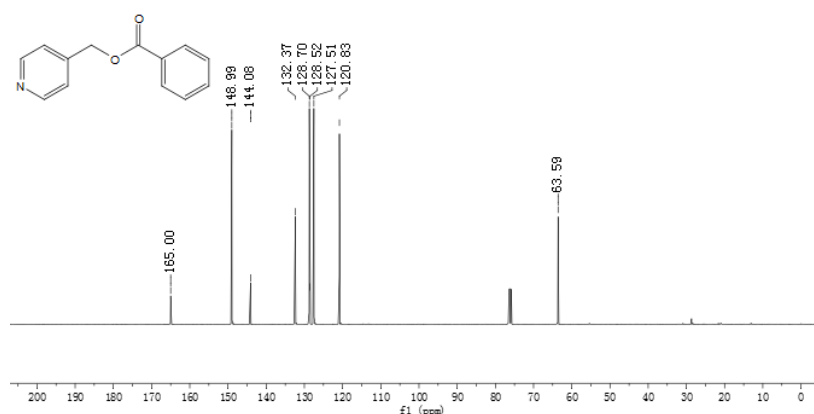

**<sup>1</sup>H-NMR spectrum of 2-Pyridylmethyl benzoate (3h)**

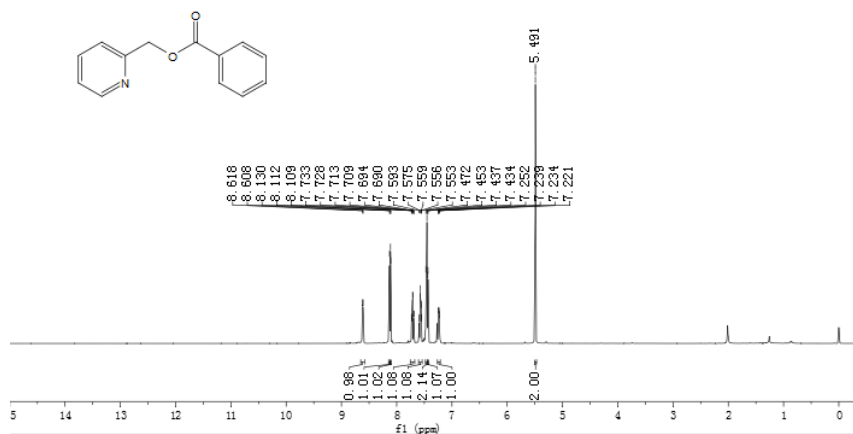

**<sup>13</sup>C-NMR spectrum of 2-Pyridylmethyl benzoate (3h)**

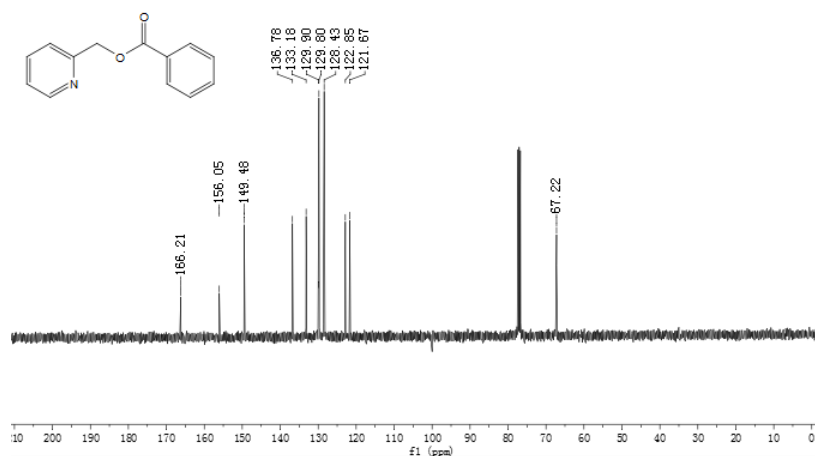

**<sup>1</sup>H-NMR spectrum of (4-chloropyridin-2-yl)methyl benzoate (3i)**

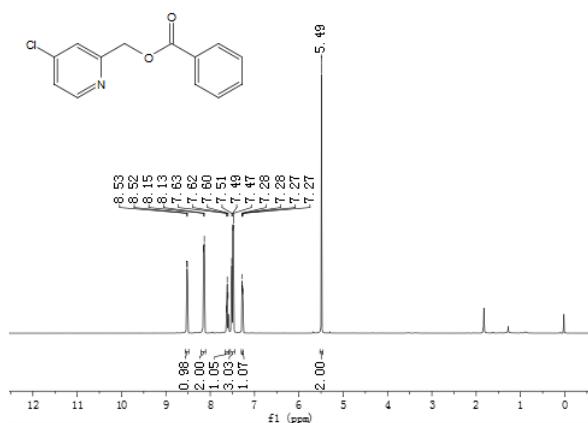

**<sup>13</sup>C-NMR spectrum of (4-chloropyridin-2-yl)methyl benzoate (3i)**

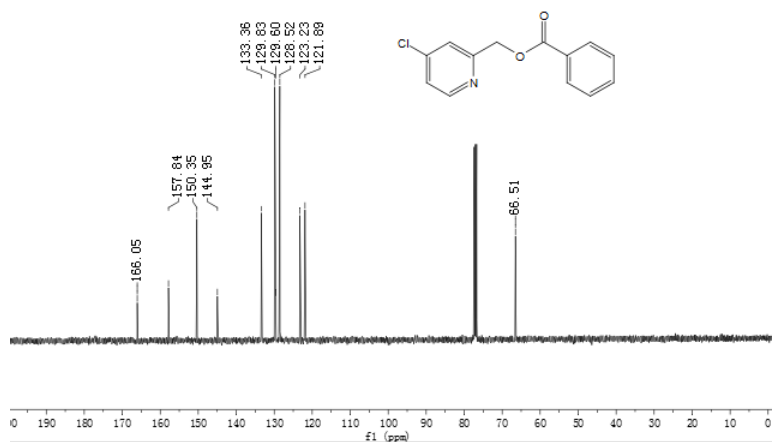



**<sup>1</sup>H-NMR spectrum of (2-chloropyridin-3-yl)methyl benzoate (3j)**

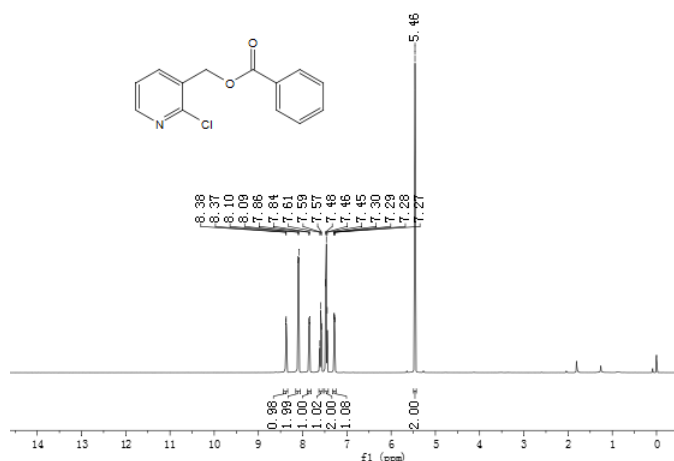

**<sup>13</sup>C-NMR spectrum of (2-chloropyridin-3-yl)methyl benzoate (3j)**

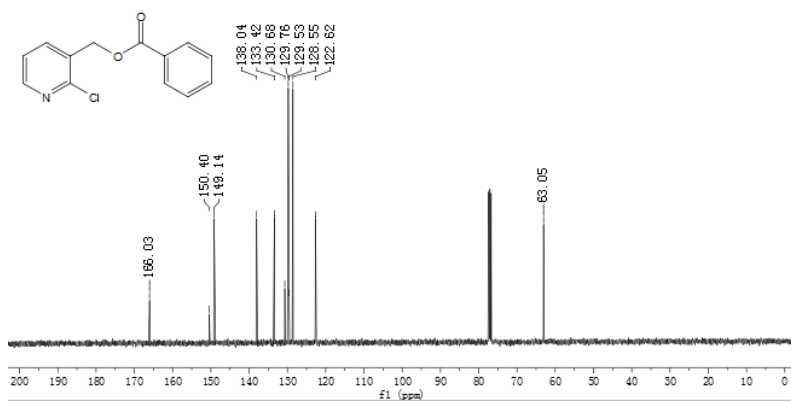

**<sup>1</sup>H-NMR spectrum of 2-nitrobenzyl acetate (3k)**

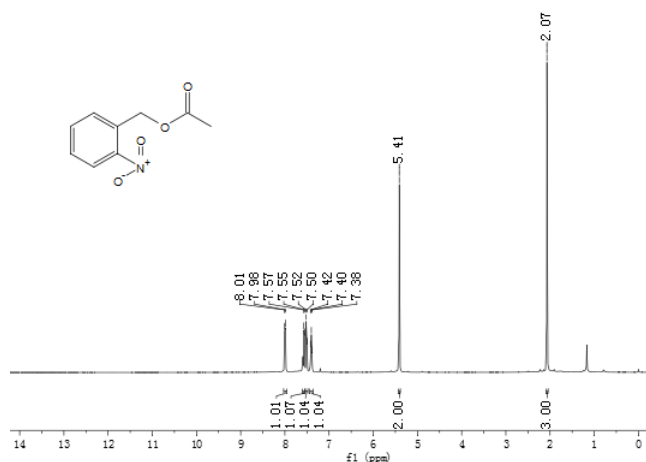

**<sup>13</sup>C-NMR spectrum of 2-nitrobenzyl acetate (3k)**

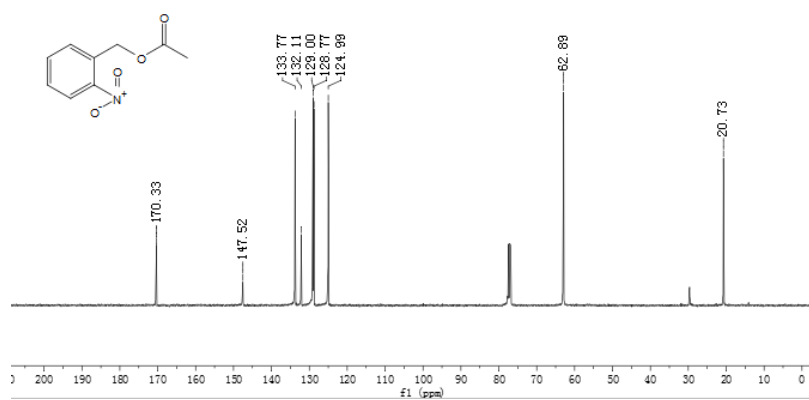

**<sup>1</sup>H-NMR spectrum of 2-nitrobenzyl benzoate (3l).**

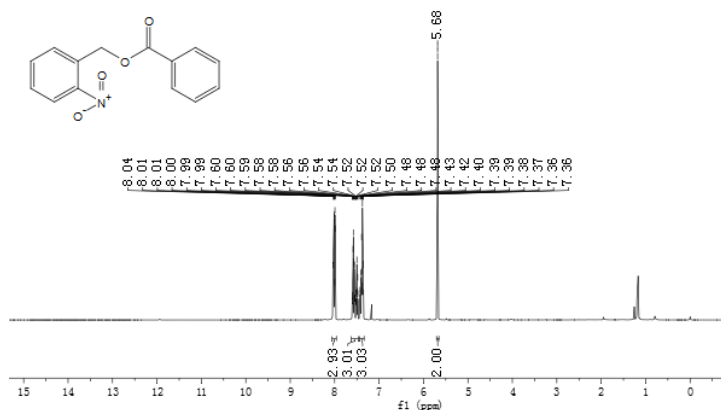

**<sup>13</sup>C-NMR spectrum of 2-nitrobenzyl benzoate (3l)**

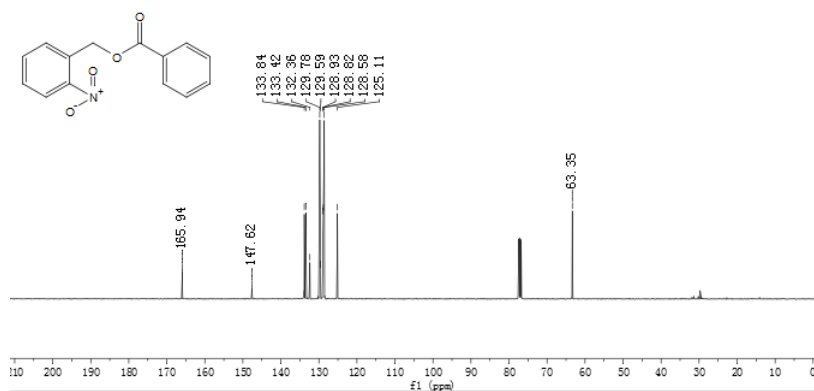

### <sup>1</sup>H- NMR spectrum of benzyl benzoate (3m)

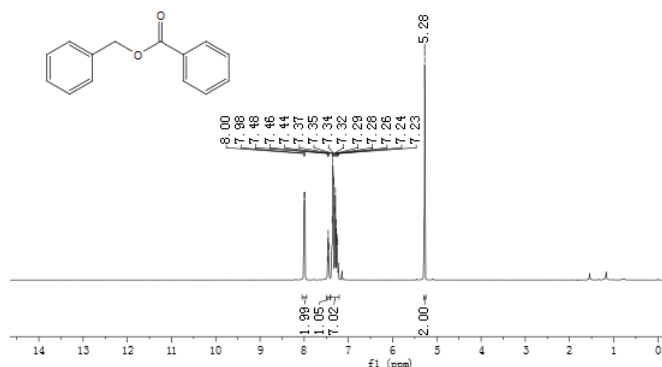

### <sup>13</sup>C-NMR spectrum of benzyl benzoate (3m)

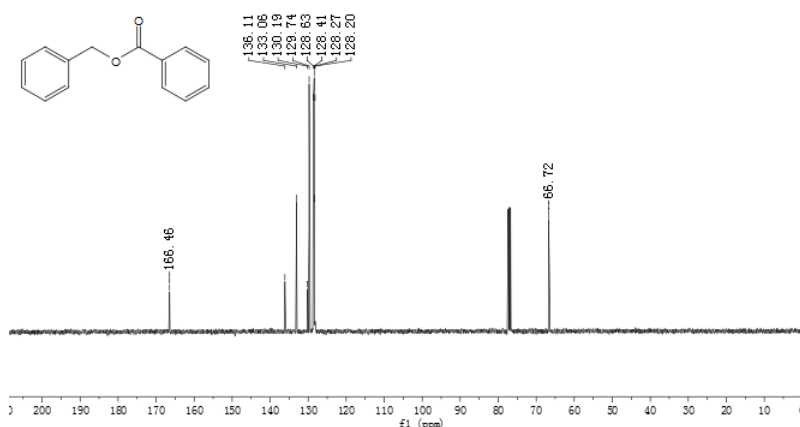

### <sup>1</sup>H- NMR spectrum of pentyl benzoate (3n)

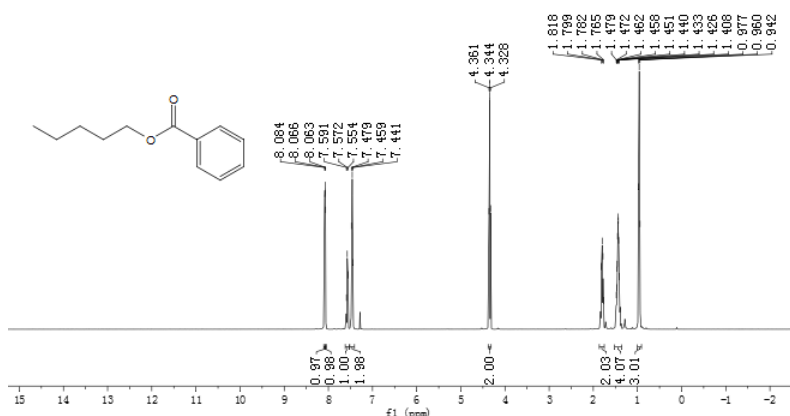

**$^{13}\text{C}$ -NMR spectrum of pentyl benzoate (3n)**

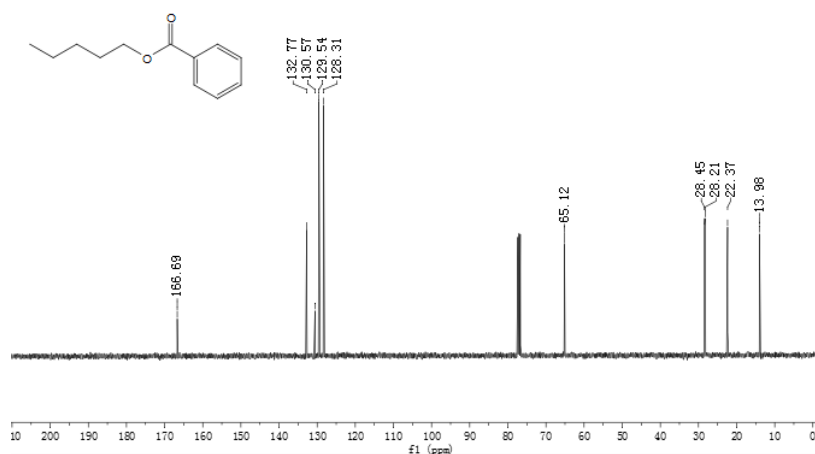

**$^1\text{H}$ -NMR spectrum of benzyl 4-nitrobenzoate (4a)**

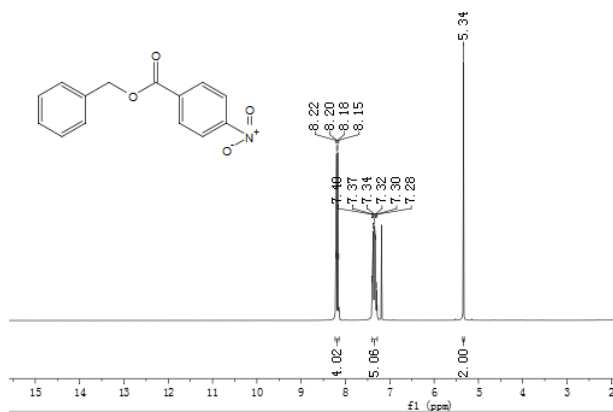

**$^{13}\text{C}$ -NMR spectrum of benzyl 4-nitrobenzoate (4a)**

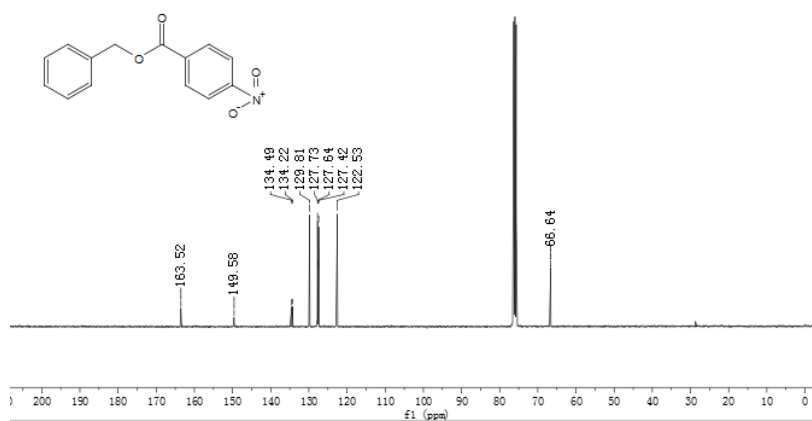

Chemical structure: O=[N+]([O-])c1ccc(cc1)C(=O)OCc2ccc(Cl)cc2

<sup>1</sup>H NMR spectrum (DMSO-d<sub>6</sub>) showing peaks at 8.23, 8.20, 8.16, 8.14, 7.34, 7.32, 7.30, 7.29, 5.30, and 2.00 ppm. Integration values are provided for the aromatic region (8.23: 2.07, 8.20: 2.02, 8.16: 2.02, 8.14: 4.05) and the methylene peak (2.00).

Chemical structure of 4-chlorobenzyl 4-nitrobenzoate and its corresponding <sup>13</sup>C NMR spectrum (Figure 1).

The chemical structure is 4-chlorobenzyl 4-nitrobenzoate, which consists of a 4-chlorobenzyl group (a benzene ring with a chlorine atom at the para position, attached to a CH<sub>2</sub> group) linked via an ester bond to a 4-nitrobenzoate group (a benzene ring with a nitro group at the para position, attached to a carbonyl group).

The <sup>13</sup>C NMR spectrum (Figure 1) shows the following chemical shifts (ppm):

- 164.45
- 150.69
- 135.30
- 134.67
- 133.73
- 130.83
- 129.87
- 128.98
- 123.60
- 66.83

The spectrum displays a series of peaks in the aromatic region (123.60 to 164.45 ppm) and a single peak in the aliphatic region (66.83 ppm). The peak at 66.83 ppm corresponds to the carbonyl carbon of the ester group.

Chemical structure: CCCC(=O)c1ccc([N+](=O)[O-])cc1

<sup>1</sup>H NMR spectrum (DMSO-d<sub>6</sub>) showing peaks at 8.20, 8.19, 8.15, 7.82, 7.81, 7.78, 2.00, 2.09, 1.36, 1.37, and 1.38 ppm. Integration values are 2.05, 2.02, 2.00, 2.09, and 3.04.

**$^{13}\text{C}$ -NMR spectrum of butyl-4-nitrobenzoate (4c).**

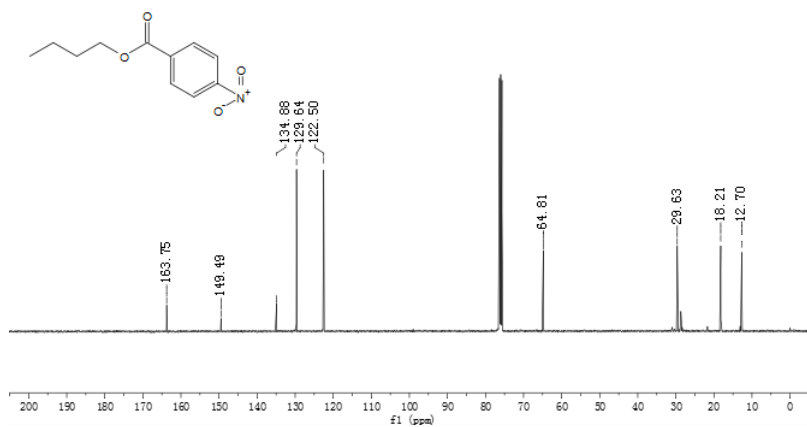

**$^1\text{H}$ -NMR spectrum of pentyl 4-nitrobenzoate (4d)**

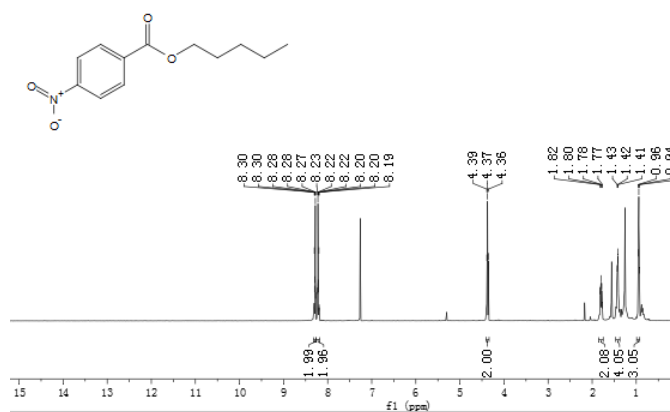

**$^{13}\text{C}$ -NMR spectrum of pentyl 4-nitrobenzoate (4d)**

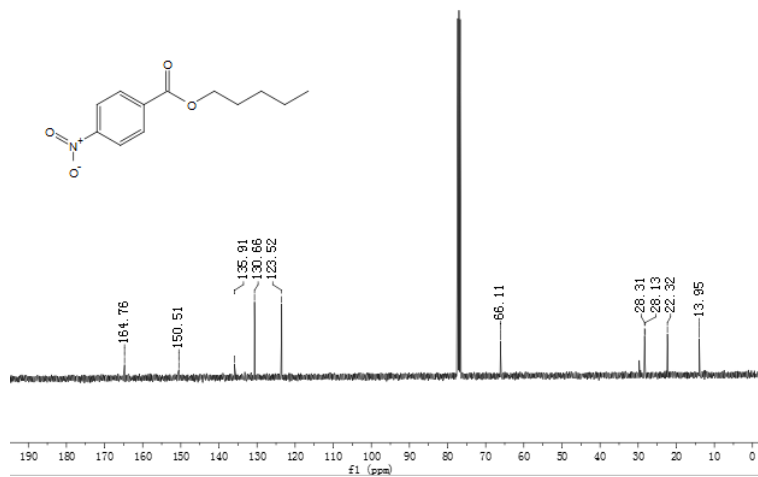

**<sup>1</sup>H-NMR spectrum of 4-chlorophenethyl 4-nitrobenzoate (4e)**

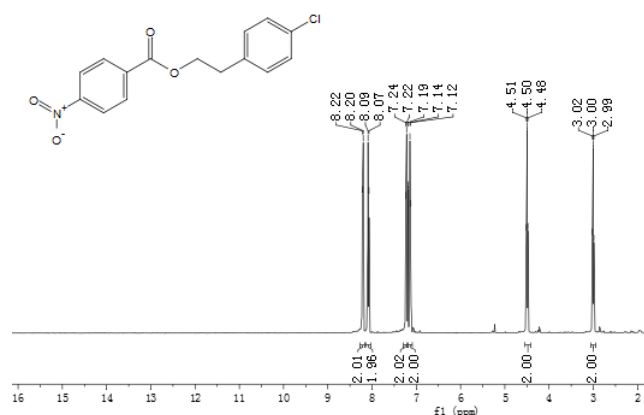

**<sup>13</sup>C-NMR spectrum of 4-chlorophenethyl 4-nitrobenzoate (4e)**

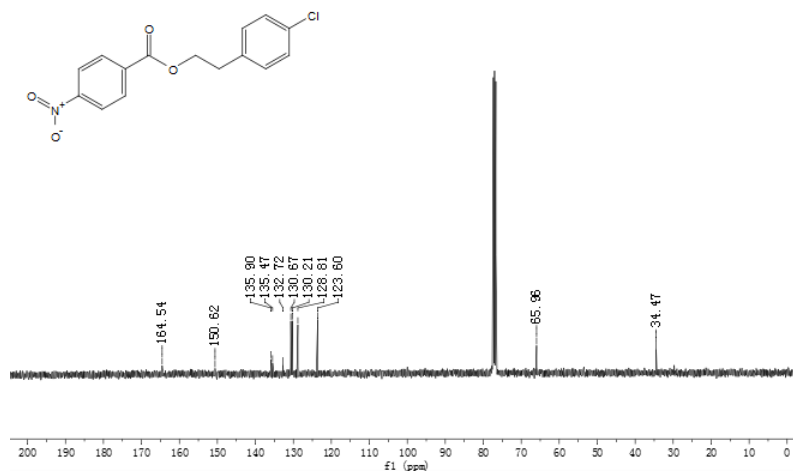

**<sup>1</sup>H-NMR spectrum of 3-Pyridylmethyl-4-nitrobenzoate (4f)**

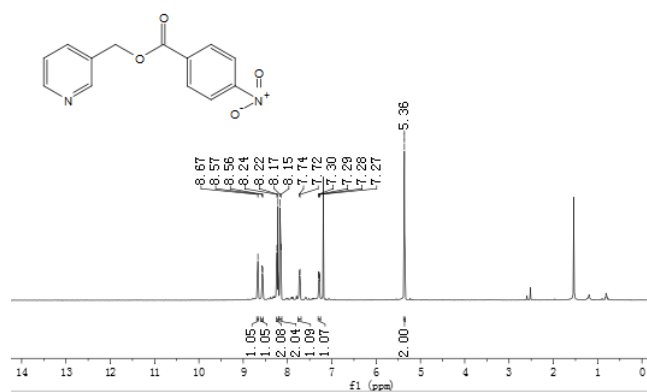

**<sup>13</sup>C-NMR spectrum of 3-Pyridylmethyl-4-nitrobenzoate (4f)**

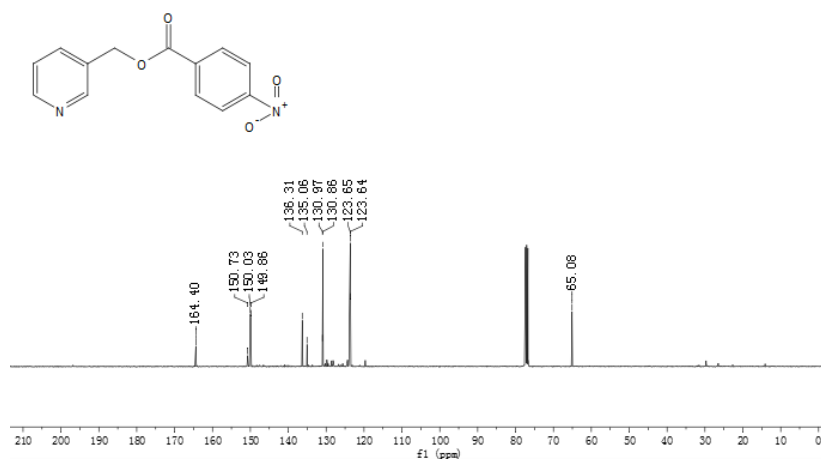

**<sup>1</sup>H-NMR spectrum of 4-Pyridylmethyl-4-nitrobenzoate (4g).**

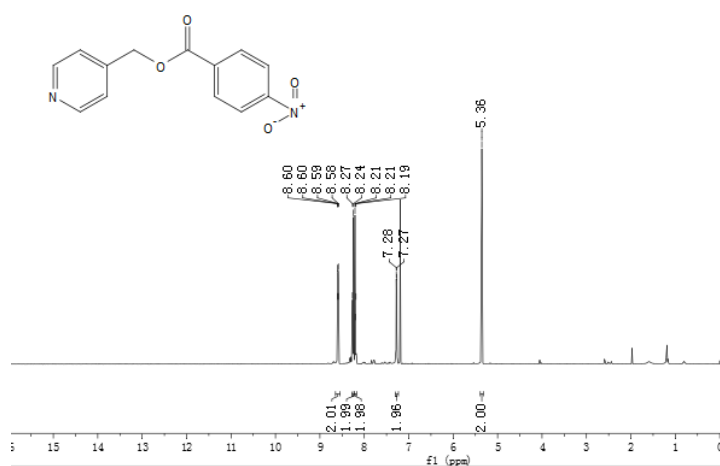

**<sup>13</sup>C-NMR spectrum of 4-Pyridylmethyl-4-nitrobenzoate (4g).**

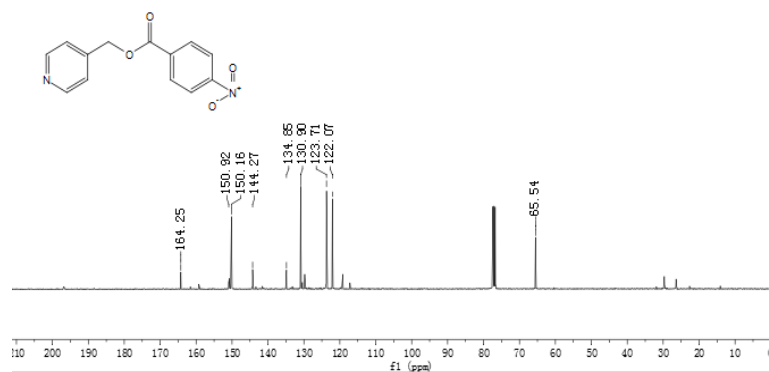



**<sup>1</sup>H-NMR spectrum of (2-chloropyridin-3-yl)methyl 4-nitrobenzoate (4h).**

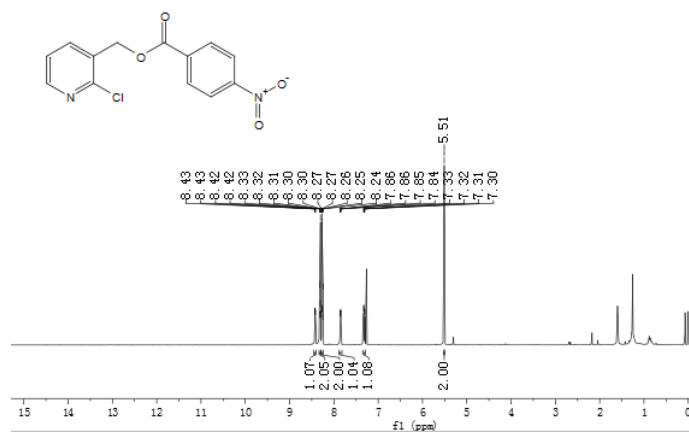

**<sup>13</sup>C-NMR spectrum of (2-chloropyridin-3-yl)methyl 4-nitrobenzoate (4h)**

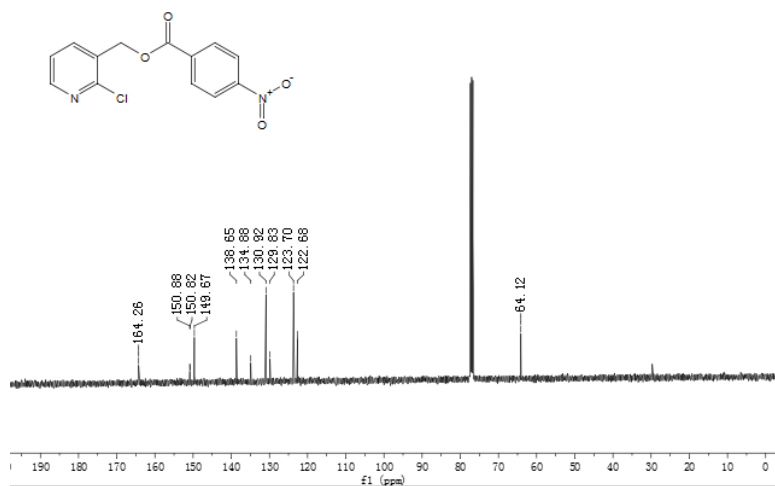

Supplement: c4ra04618h1.pdf [file c4ra04618h1.pdf]
